# Supplementary material
Source: PubMed Central journal article supplement (PMC4464986)
Supplement: NIHMS686189-supplement-1.pdf [file NIHMS686189-supplement-1.pdf]

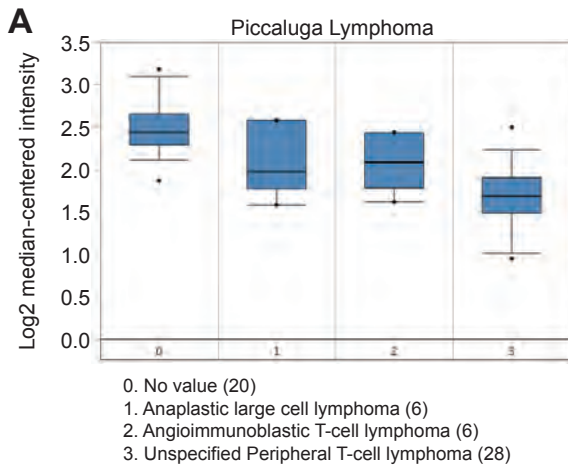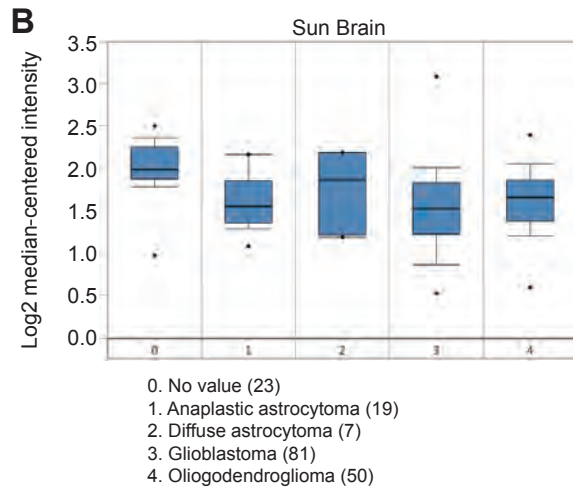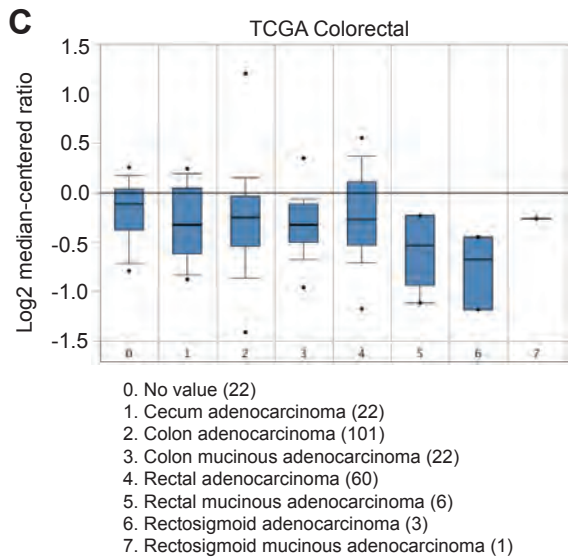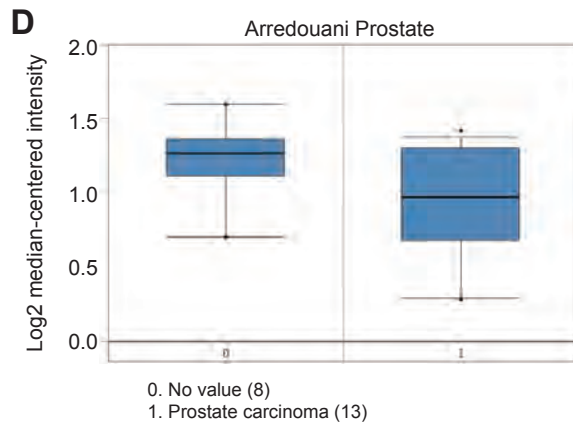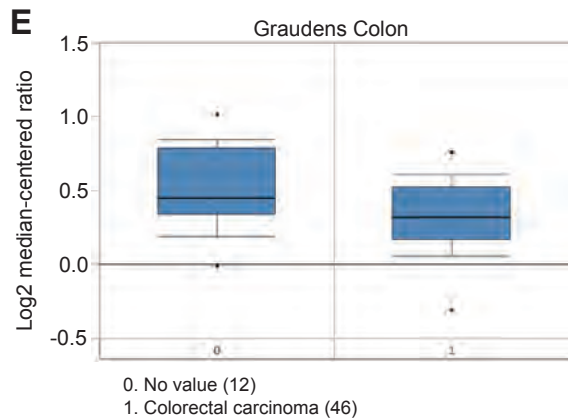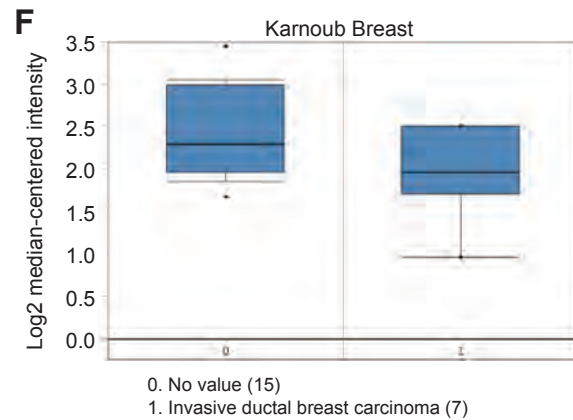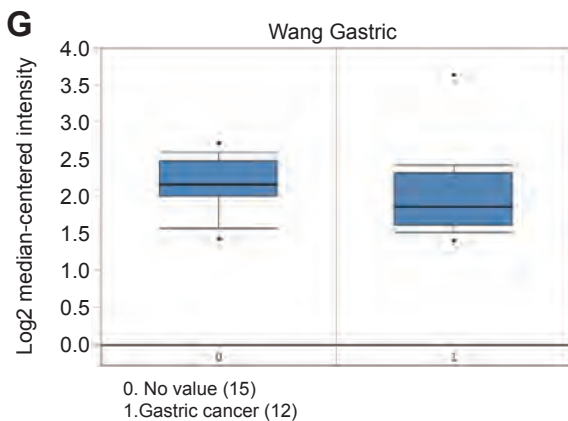

**A**

```

HeLa          GCAGTCTCATTATGGGACACCGTACCCCAGCCACCTGGGCCAGTGGGCATGGGCAACAG
CRTC2 KO1-Allele1 GCAGTCTCATTATGGGACACCGTACT-----CACCTGGGCCAGTGGGCATGGGCAACAG
CRTC2 KO1-Allele2 GCAGTCTCATTATGGGACACCGTACTC-----TGGGCCAGTGGGCATGGGCAACAG
CRTC2 KO2-Allele1 GCAGTCTCATTATGGGACACCGTAC-----TGGGCCAGTGGGCATGGGCAACAG
CRTC2 KO2-Allele2 GCAGTCTCATTATGGGACACCGTACCCCA---CCTGGGCCAGTGGGCATGGGCAACAG
    
```

**B**

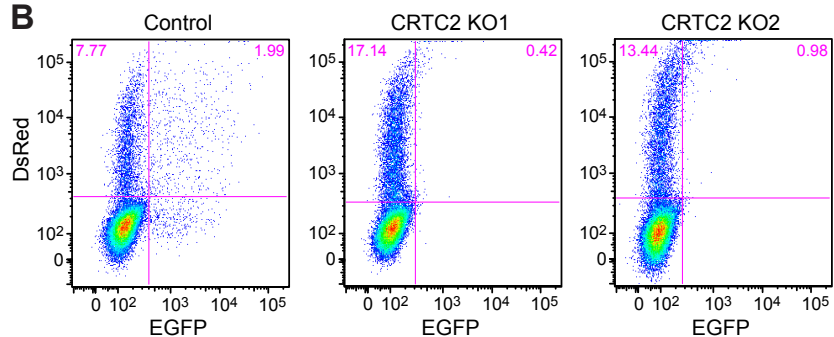

**C**

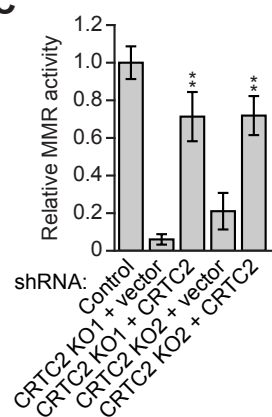

**D**

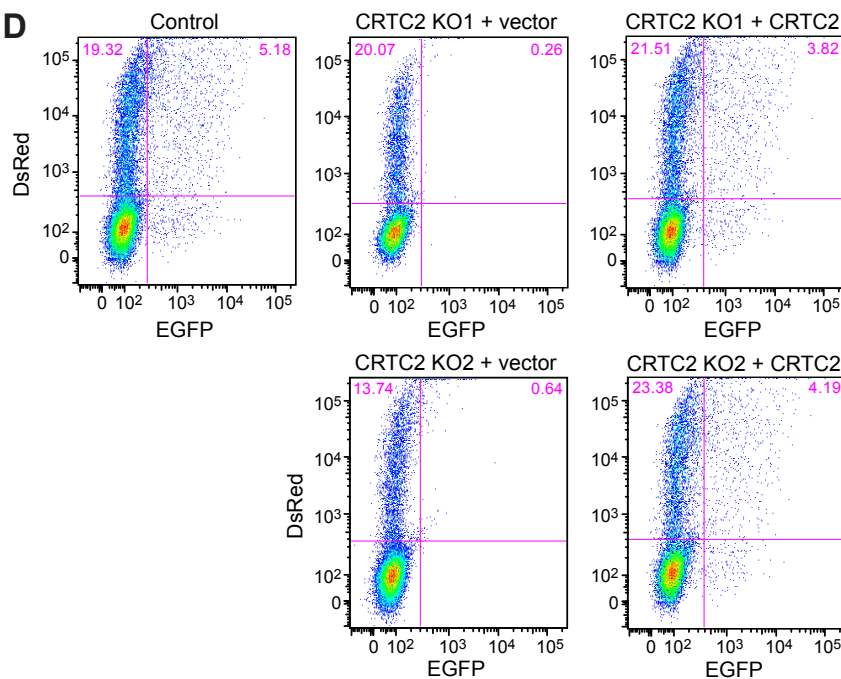

**E**

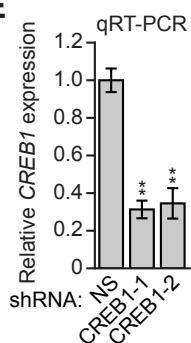

**F**

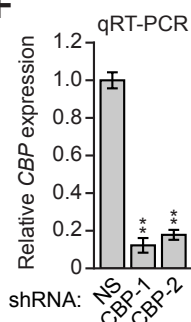

**G**

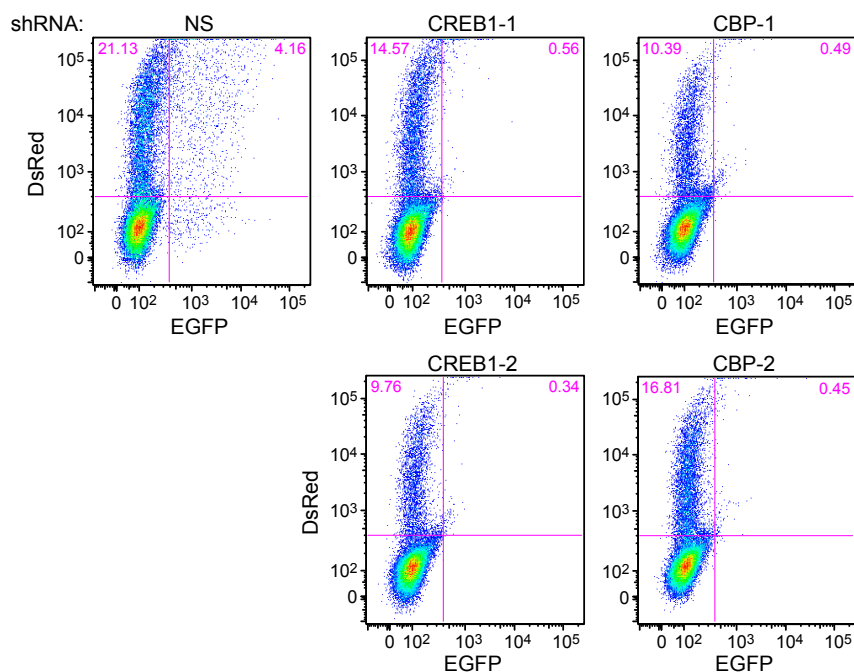

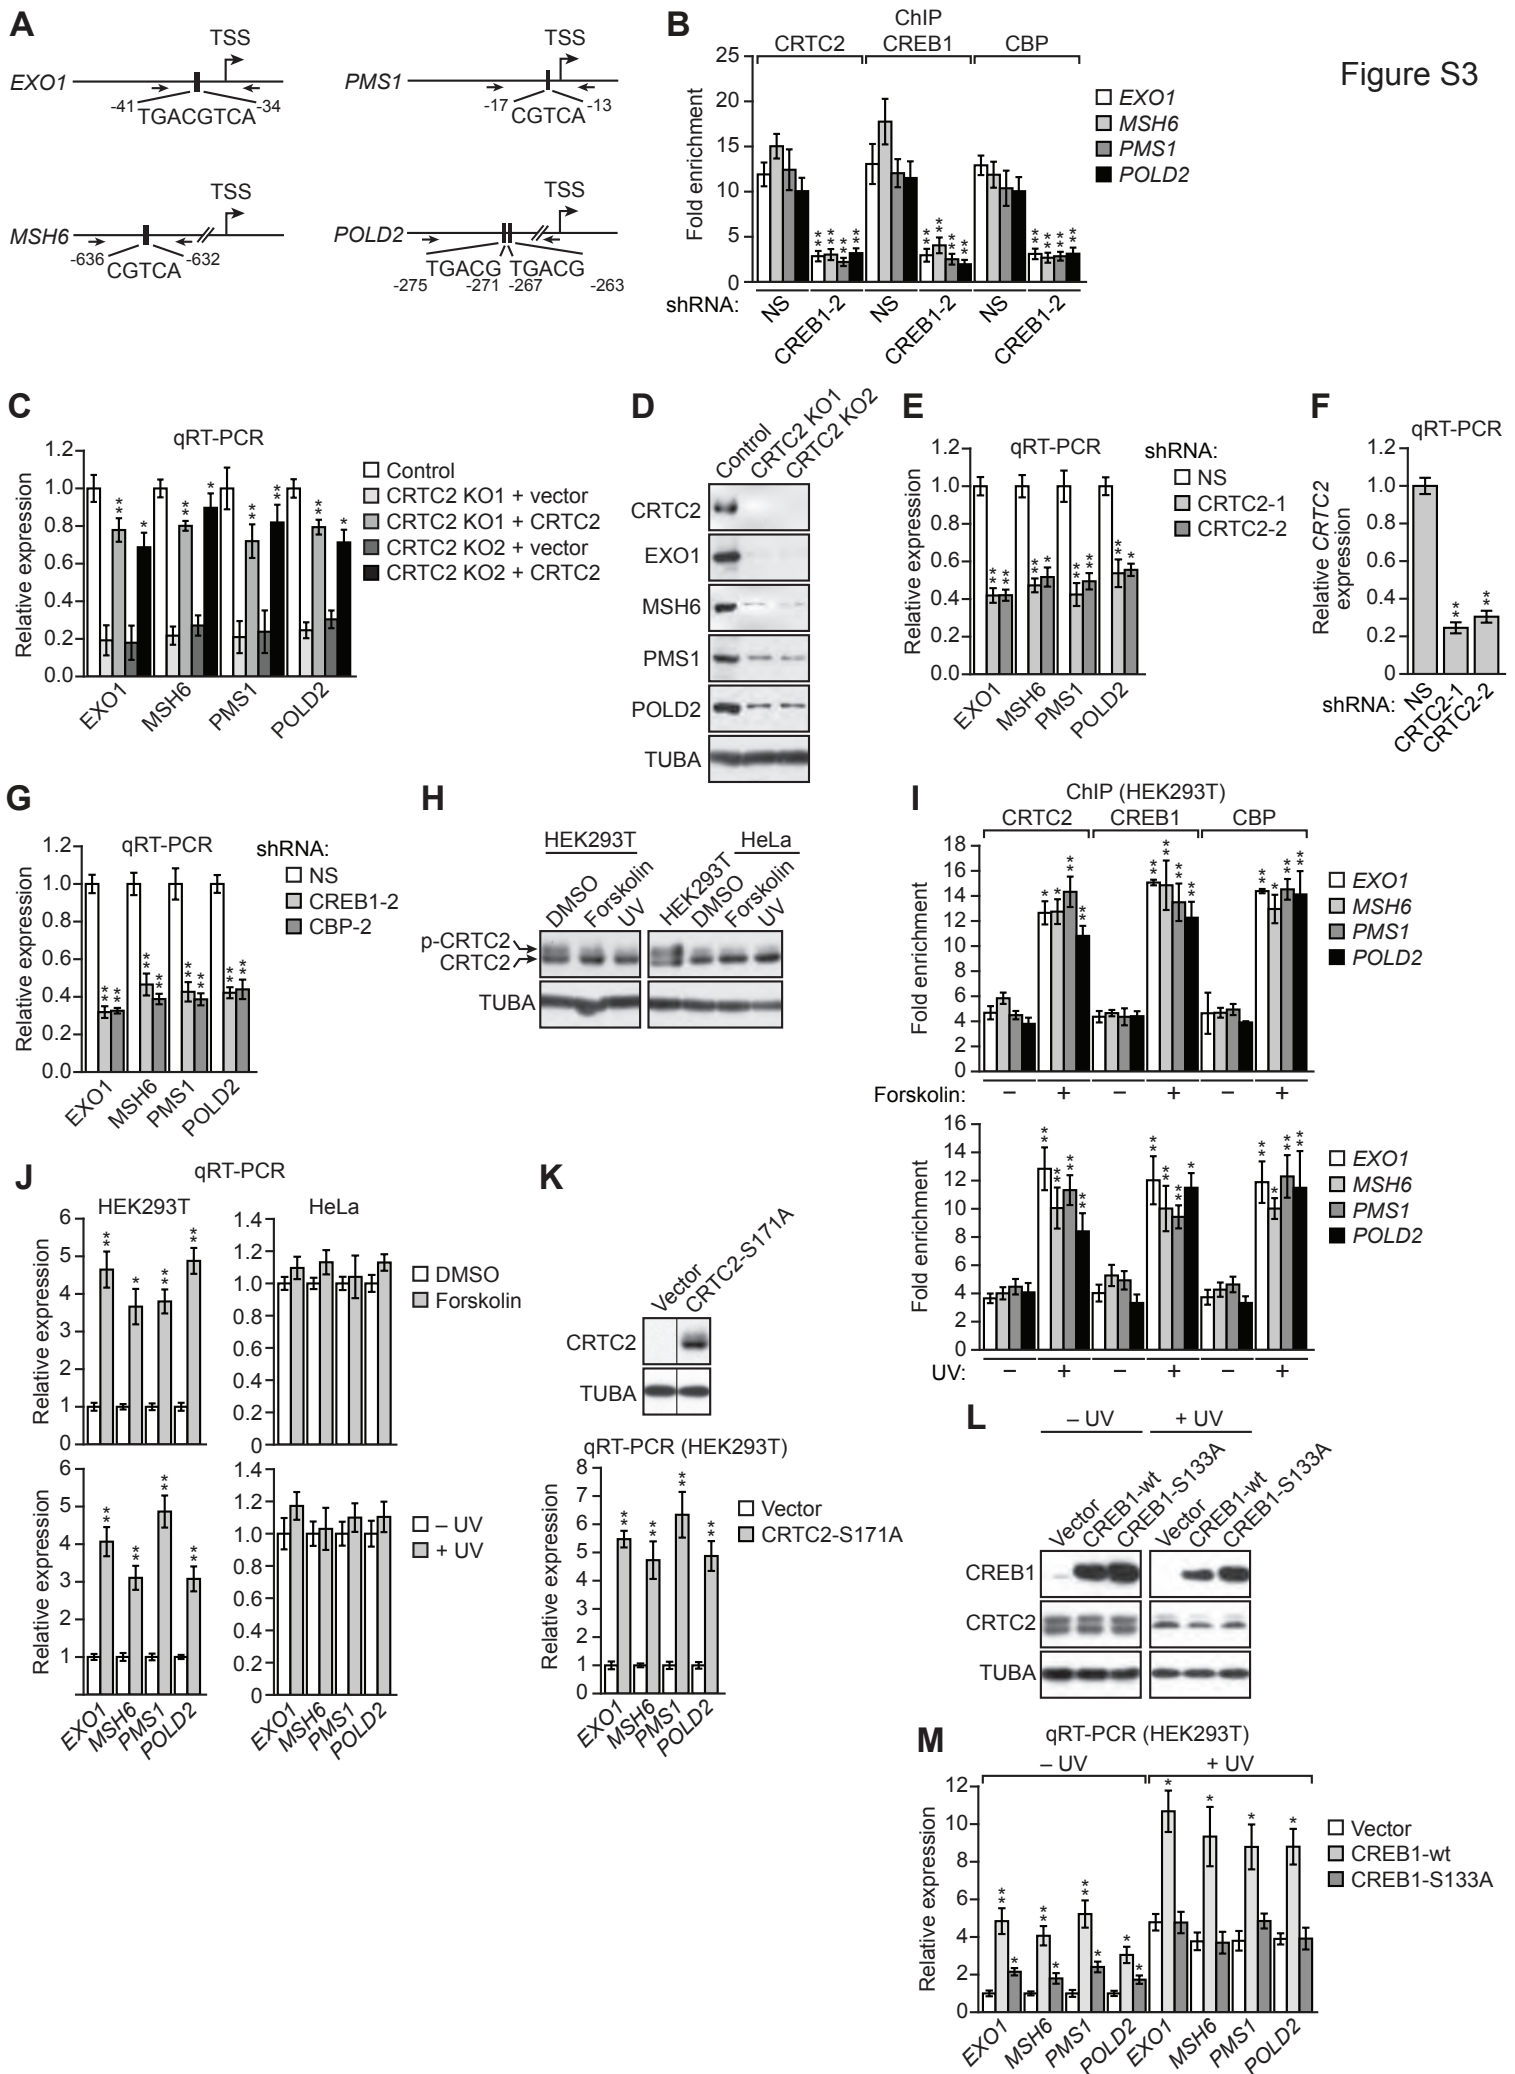

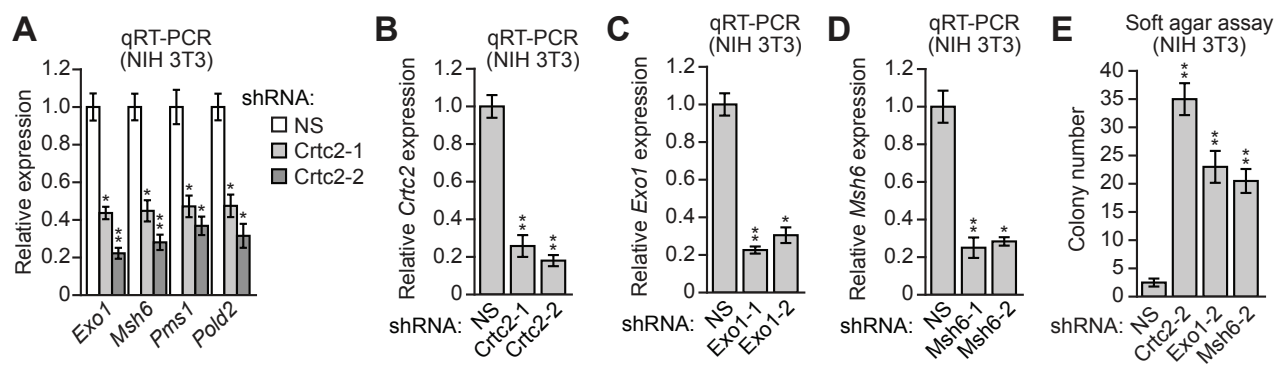

## SUPPLEMENTAL FIGURE LEGENDS

### Figure S1. *CRTC2* is Down-regulated in Multiple Cancers (Related to Figure 1)

(A-E) Representative boxplots from OncoPrint data analysis showing *CRTC2* is significantly down-regulated ( $P < 1E-4$ , fold change  $> 2$ ) in cancer versus normal tissue for lymphoma (Piccaluga et al., 2007), brain (Sun et al., 2006), colorectal (Graudens et al., 2006), prostate (Arredouani et al., 2009), breast (Karnoub et al., 2007) and gastric (Wang et al., 2012) cancers. The OncoPrint data analysis revealed that the most significant downregulation of *CRTC2* occurred in the Piccaluga lymphoma samples.

### Figure S2. Additional Experiments Related to Figure 1

(A) Sequence analysis of both alleles in each of the two *CRTC2* KO HeLa cell lines. The results confirmed that both alleles in each cell line were disrupted, and that the deletions resulted in a frameshift, leading to a premature stop codon.

(B) Representative FACS plots showing the percentage of EGFP-positive, DsRed-positive and EGFP-negative, DsRed-positive cells sorted from control HeLa and *CRTC2* KO1 and KO2 HeLa cells co-transfected with an EGFP heteroduplexed mismatch plasmid and DsRed-N1.

(C) MMR activity assay in control HeLa cells or *CRTC2* KO HeLa cells expressing *CRTC2* or empty vector.

(D) Representative FACS plots showing the percentage of EGFP-positive, DsRed-positive, and EGFP-negative, DsRed-positive cells sorted from *CRTC2* KO HeLa cells expressing *CRTC2* or empty vector and co-transfected with an EGFP heteroduplexed mismatch plasmid and DsRed-N1.

(E,F) qRT-PCR analysis monitoring knockdown efficiency of *CREB1* (E) and *CBP* (F) in HeLa cells expressing a non-silencing (NS) shRNA or one of two *CREB1* or *CBP* shRNAs. For all graphs, error bars indicate standard deviation.  $**P < 0.01$ .

(G) Representative FACS plots showing the percentage of EGFP-positive, DsRed-positive, and EGFP-negative, DsRed-positive cells sorted from HeLa cells expressing a NS, *CREB1* or *CBP* shRNA and co-transfected with an EGFP heteroduplexed mismatch plasmid and DsRed-N1.

### Figure S3. Schematic Diagrams and Additional Experiments Related to Figure 2

(A) Schematic diagrams showing the position and sequence of the CRE site, either an octameric palindrome (5'-TGACGTCA-3') or a less active half-site motif (5'-TGACG-3' or 5'-CGTCA-3') (Mayr and Montminy, 2001), in the promoters of *EXO1*, *MSH6*, *PMS1* and *POLD2*.

(B) ChIP analysis monitoring occupancy of *CRTC2*, *CREB1* and *CBP* on the promoters of *EXO1*, *MSH6*, *PMS1* and *POLD2* in HeLa cells expressing a NS shRNA or a *CREB1* shRNA unrelated to that shown in Fig. 2B.

(C) qRT-PCR analysis monitoring expression of *EXO1*, *MSH6*, *PMS1* and *POLD2* in control HeLa cells or *CRTC2* KO HeLa cells expressing *CRTC2* or empty vector.

(D) Immunoblot analysis monitoring levels of *CRTC2*, *EXO1*, *MSH6*, *PMS1* and *POLD2* in control HeLa cells and *CRTC2* KO HeLa cells.  $\alpha$ -tubulin (TUBA) was monitored as a loading control.

(E) qRT-PCR analysis monitoring expression of *EXO1*, *MSH6*, *PMS1* and *POLD2* in HeLa cells expressing an NS shRNA or one of two unrelated *CRTC2* shRNAs.

(F) qRT-PCR analysis monitoring knockdown efficiency of *CRTC2* in HeLa cells expressing an NS or *CRTC2* shRNA.

- (G) qRT-PCR analysis monitoring expression of *EXO1*, *MSH6*, *PMS1* and *POLD2* in HeLa cells expressing an NS shRNA or CREB1 or CBP shRNA unrelated to that used in Fig. 2D.
- (H) Immunoblot analysis monitoring CRTC2 phosphorylation in HeK293T or HeLa cells treated with DMSO, forskolin or UV. CRTC2 phosphorylation was monitored by mobility shift. These blots used 5% gels and long running times to optimize the resolution of the two bands; the top band represents phosphorylated CRTC2 (p-CRTC2) and the bottom band represents the unphosphorylated form.  $\alpha$ -tubulin (TUBA) was monitored as a loading control.
- (I) ChIP analysis monitoring occupancy of CRTC2, CREB1 and CBP on the promoters of *EXO1*, *MSH6*, *PMS1* and *POLD2* in HEK293T cells treated in the presence or absence of forskolin.
- (J) qRT-PCR analysis monitoring expression of *EXO1*, *MSH6*, *PMS1* and *POLD2* in HEK293T or HeLa cells treated in the presence or absence of UV.
- (K) (Top) Immunoblot analysis confirming ectopic expression of the CRTC2-S171A mutant. Non-adjacent lanes from the same gel were spliced together as indicated by the dividing line. (Bottom) qRT-PCR analysis monitoring expression of *EXO1*, *MSH6*, *PMS1* and *POLD2* in HEK293T cells expressing empty vector (pcDNA3.1) or CRTC2-S171A.
- (L) Immunoblot analysis monitoring CREB1 levels in HEK293T cells expressing empty vector (pcDNA3.1), wild-type CREB1 (CREB1-wt) or CREB1-S133A and treated with or without UV 30 J/m<sup>2</sup> 24 hours post transfection. CRTC2 phosphorylation was also monitored; as expected, dephosphorylation of CRTC2 following UV irradiation was equivalent in the presence of wild type CREB1 or CREB1-S133A.
- (M) qRT-PCR analysis monitoring expression of *EXO1*, *MSH6*, *PMS1* and *POLD2* in HEK293T cells expressing empty vector, CREB1-wt or CREB1-S133A and treated in the presence or absence of UV. For all graphs, error bars indicate SD. \* $P < 0.05$ , \*\* $P < 0.01$ .

**Figure S4. Additional Experiments Related to Figure 3**

- (A) qRT-PCR analysis monitoring expression of *Exo1*, *Msh6*, *Pms1* and *Pold2* in NIH 3T3 cells expressing an NS shRNA or one of two unrelated *Crtc2* shRNAs.
- (B-D) qRT-PCR analysis monitoring knockdown efficiency of *Crtc2* (B), *Exo1* (C) or *Msh6* (D) in NIH 3T3 cells expressing an NS shRNA or one of two unrelated *Crtc2*, *Exo1* or *Msh6* shRNAs.
- (E) Soft agar assay monitoring colony forming ability of NIH 3T3 cells expressing a NS, *Crtc2*, *Exo1* or *Msh6* shRNA unrelated to that used in Fig. 3A. For all graphs, error bars indicate SD. \* $P < 0.05$ , \*\* $P < 0.01$ .

**Table S1. List of mutations in *CRTC2* (transcript ENST00000368633) Found in the COSMIC Database (Related to Figure 1)**

Please see the accompanying Excel file.

**Table S2. List of Lymphoma Samples Used in this Study (Related to Figure 3)**

The diagnosis, source tissue and, for formalin-fixed paraffin embedded (FFPE) samples, whether or not *CRTC2* could be detected by immunohistochemistry (IHC) are given. ALCL, anaplastic large cell lymphoma, ATCL, angioimmunoblastic T-cell lymphoma, PTCL/U, peripheral T-cell lymphoma unspecified.

| Sample             | Diagnosis | Tissue                                      | CRTC2 IHC |
|--------------------|-----------|---------------------------------------------|-----------|
| <b>FFPE</b>        |           |                                             |           |
| 1                  | ATCL      | Lymph node, right cervical, biopsy          | Negative  |
| 2                  | ATCL      | Lymph node, biopsy                          | Negative  |
| 3                  | ALCL      | Retroperitoneal mass                        | Negative  |
| 4                  | ATCL      | Lymph node, biopsy                          | Negative  |
| 5                  | ATCL      | Lymph node excision                         | Negative  |
| 6                  | ATCL      | Lymph node, inguinal, biopsy                | Negative  |
| 7                  | ALCL      | Mass, right iliac fossa, needle core biopsy | Negative  |
| 8                  | PTCL/U    | Retroperitoneal lymph node                  | Negative  |
| 9                  | ALCL      | Right anterior axillary lymph node, biopsy  | Negative  |
| 10                 | ALCL      | Left thigh, core biopsies                   | Negative  |
| 11                 | PTCL/U    | Spleen, splenectomy                         | Negative  |
| 12*                | ATCL      | Lymph node, left inguinal, biopsy           | Negative  |
| 13                 | PTCL/U    | Lymph node, left inguinal, biopsy           | Negative  |
| 14                 | ATCL      | Lymph node, right cervical, excision        | Negative  |
| 15                 | ATCL      | Lymph node, left inguinal, excision         | Negative  |
| 16                 | ATCL      | Lymph node, left axillary, excision         | Positive  |
| 17                 | ATCL      | Lymph node, left cervical, biopsy           | Negative  |
| 18                 | ALCL      | Lymph node (4R), biopsy                     | Negative  |
| 19                 | ALCL      | Lymph node, right inguinal region           | Negative  |
| 20*                | ALCL      | Skin, right and left leg, punch             | Negative  |
| 21                 | PTCL/U    | Right parotid mass, excisional biopsy       | Negative  |
| 22                 | PTCL/U    | Lymph node, biopsy                          | Negative  |
| 23*                | ALCL      | Skin, right upper posterior thigh           | Negative  |
| 24                 | ALCL      | Right axillary lymph node, excision         | Negative  |
| <b>Snap-frozen</b> |           |                                             |           |
| A                  | ALCL      | Lymph node excision                         | N/A       |
| B                  | ALCL      | Retroperitoneal mass                        | N/A       |
| C                  | ATCL      | Lymph node, inguinal, biopsy                | N/A       |
| D                  | PTCL/U    | Retroperitoneal lymph node                  | N/A       |
| E                  | PTCL/U    | Lymph node excision                         | N/A       |
| F                  | ATCL      | Lymph node (left cervical), biopsy          | N/A       |
| G                  | PTCL/U    | Lymph node, biopsy                          | N/A       |

\* Indicates primary cutaneous lymphoma.

## SUPPLEMENTAL EXPERIMENTAL PROCEDURES

### Cell Lines and Culture

HEK293T and NIH 3T3 cells (ATCC) were cultured in DMEM or DMEM with 10% FBS, respectively. For drug treatments, HEK293T or HeLa cells were treated with 10  $\mu$ M forskolin (Sigma) for 4 hours or UV (30 J/cm<sup>2</sup>). Plasmids expressing wild-type CRTC2 or CRTC2-S171A (Screaton et al., 2004), or wild-type CREB1 or CREB1-S133A (Du et al., 2000) were provided by Marc Montminy (Salk Institute).

### shRNA-Mediated Knockdown

Cells were stably transduced with short hairpin RNA (shRNAs) viruses from Open Biosystems/GE Dharmacon listed below. Infected cells were then selected with puromycin.

#### List of Catalog Numbers for shRNAs Obtained from Open Biosystems/GE Dharmacon

| Gene                 | First shRNA    | Second shRNA   |
|----------------------|----------------|----------------|
| <i>CRTC2</i> (human) | V3LHS 379706   | V3LHS 379707   |
| <i>CREB1</i> (human) | TRCN0000007310 | TRCN0000011085 |
| <i>CBP</i> (human)   | TRCN0000011027 | TRCN0000006488 |
| <i>Crtc2</i> (mouse) | TRCN0000173279 | TRCN0000176130 |
| <i>Msh6</i> (mouse)  | TRCN0000071163 | TRCN0000071165 |
| <i>Exo1</i> (mouse)  | TRCN0000071123 | TRCN0000071124 |

### Real-Time qRT-PCR

Total RNA was isolated, and reverse transcription was performed as described previously (Gazin et al., 2007), followed by real-time qPCR with Platinum SYBR green qPCR SuperMix-UDG with Rox (Invitrogen) using the primers listed below.

#### List of Primers Used for qRT-PCR

| Gene                 | Forward (5' $\rightarrow$ 3') | Reverse (5' $\rightarrow$ 3') |
|----------------------|-------------------------------|-------------------------------|
| <i>CRTC2</i> (human) | CCACCAGAACTTGACCCACT          | GGCTGCTGCAATCTCCTTAG          |
| <i>Crtc2</i> (mouse) | CCACCAGAACTTGACCCACT          | GGCTGCTGCAATCTCCTTAG          |
| <i>EXO1</i> (human)  | AGCTTGGGGATGTATTCACG          | TGCCTTTGCTAATCCAATCC          |
| <i>Exo1</i> (mouse)  | CAGGCTGTCATCACAGAGGA          | CTGGTCCACTTCCAGTCCAT          |
| <i>MSH6</i> (human)  | GGAGGAAGGAAGCAGTGATG          | CATTCTCTCCGCTTTCGAG           |
| <i>Msh6</i> (mouse)  | CTGCCATCAGTGACCGTCTA          | TCAAGGTCTGGCAGCTTCTT          |
| <i>PMS1</i> (human)  | GGCTGTTGATGCACCTGTAA          | GCTTCTCCACGAAAACCGTA          |
| <i>Pms1</i> (mouse)  | TGGAATCTGTTGAGCAGCAC          | GGGGTTGAAAGACTTGTGGA          |
| <i>POLD2</i> (human) | GAGACCCTTCTGGAGAACC           | CCACACAGCACTTCTCCTCA          |
| <i>Pold2</i> (mouse) | CAGTGTGGAGGCAGTCAAAA          | AGTTGGTGGGATCAAACCTCG         |

### Spontaneous Mutation Frequency

The *HPRT* mutation assay was conducted as described previously (Kat et al., 1993). Briefly,  $5 \times 10^6$  cells were seeded in triplicate in 100 mm dishes for 12 hr and fed with complete medium containing 5  $\mu$ M freshly prepared 6-thioguanine (6-TG; Sigma). The plating efficiency was determined by culturing  $5 \times 10^2$  cells similarly in the absence of 6-TG. After 10 days of culturing, cell colonies were visualized by staining with 0.03% crystal violet. The mutation frequency was



determined by dividing the number of 6-TG-resistant colonies by the total number of cells plated after being corrected for colony-forming ability.

### ChIP Assays

ChIP assays were performed as previously described (Raha et al., 2005) using an anti-CRTC2 (Bethyl Laboratories), anti-CREB1 (Cell Signaling Technology), anti-CBP (Bethyl Laboratories) or anti-histone H3 (acetyl K9+K14+K18+K23+K27) (Abcam, ab47915) antibody. ChIP products were analyzed by qPCR using primers listed below. Samples were quantified as percentage of input, and then normalized to an irrelevant region in the genome (~3.2 kb upstream from the transcription start site of *GCLC*). Fold enrichment was calculated by setting the IgG control IP sample to 1.

#### List of Primers Used for ChIP

| Gene         | Forward (5' → 3')     | Reverse (5' → 3')    |
|--------------|-----------------------|----------------------|
| <i>EXO1</i>  | CGTTGACGTCACATCCTCTG  | ACGCAGAACACGGGTAAGTT |
| <i>MSH6</i>  | CCCGGCCTTCATAGTCTCT   | TAAGGGCCACAGTCCGTTAT |
| <i>PMS1</i>  | CTGGGCCAGAGAAAACCTCAG | ACGCAAATCCTCGTTGTCTT |
| <i>POLD2</i> | CAGGAAACCGAGGGTGTG    | CCATCGCCTAATCTCACCAA |

### PAT-ChIP

Formalin-fixed paraffin-embedded tonsil (n=7) and lymphoma (n=24) sections were deparaffinized, rehydrated, and processed as previously described (Fang et al., 2014) using an anti-histone H3 (acetyl K9+K14+K18+K23+K27) (Abcam, ab47915) antibody. PAT-ChIP products were analyzed by qPCR using CRTC2 forward (TCTCAGGGAGTAGCCGAGAG) and reverse (CAGTCACGCAGCACTAGGAG) primers.

### Colony Formation Assays

NIH 3T3 cells ( $1 \times 10^4$ ) stably expressing an shRNA were plated in 60-mm dishes and selected with puromycin for 14 days. Colonies were stained with crystal violet and counted.

## SUPPLEMENTAL REFERENCES

Arredouani, M.S., Lu, B., Bhasin, M., Eljanne, M., Yue, W., Mosquera, J.M., Bubley, G.J., Li, V., Rubin, M.A., Libermann, T.A., *et al.* (2009). Identification of the transcription factor single-minded homologue 2 as a potential biomarker and immunotherapy target in prostate cancer. *Clin. Cancer Res.* *15*, 5794-5802.

Du, K., Asahara, H., Jhala, U.S., Wagner, B.L., and Montminy, M. (2000). Characterization of a CREB gain-of-function mutant with constitutive transcriptional activity in vivo. *Mol. Cell. Biol.* *20*, 4320-4327.

Fang, M., Ou, J., Hutchinson, L., and Green, M.R. (2014). The BRAF oncoprotein functions through the transcriptional repressor MAFK to mediate the CpG Island Methylator phenotype. *Mol. Cell* *55*, 904-915.

Gazin, C., Wajapeyee, N., Gobeil, S., Virbasius, C.M., and Green, M.R. (2007). An elaborate pathway required for Ras-mediated epigenetic silencing. *Nature* *449*, 1073-1077.

Graudens, E., Boulanger, V., Mollard, C., Mariage-Samson, R., Barlet, X., Gremy, G., Couillault, C., Lajemi, M., Piatier-Tonneau, D., Zaborski, P., *et al.* (2006). Deciphering cellular states of innate tumor drug responses. *Genome Biol.* *7*, R19.

Karnoub, A.E., Dash, A.B., Vo, A.P., Sullivan, A., Brooks, M.W., Bell, G.W., Richardson, A.L., Polyak, K., Tubo, R., and Weinberg, R.A. (2007). Mesenchymal stem cells within tumour stroma promote breast cancer metastasis. *Nature* *449*, 557-563.

Kat, A., Thilly, W.G., Fang, W.H., Longley, M.J., Li, G.M., and Modrich, P. (1993). An alkylation-tolerant, mutator human cell line is deficient in strand-specific mismatch repair. *Proc. Natl. Acad. Sci. USA* *90*, 6424-6428.

Mayr, B., and Montminy, M. (2001). Transcriptional regulation by the phosphorylation-dependent factor CREB. *Nat. Rev. Mol. Cell Biol.* *2*, 599-609.

Piccaluga, P.P., Agostinelli, C., Califano, A., Rossi, M., Basso, K., Zupo, S., Went, P., Klein, U., Zinzani, P.L., Baccarani, M., *et al.* (2007). Gene expression analysis of peripheral T cell lymphoma, unspecified, reveals distinct profiles and new potential therapeutic targets. *J. Clin. Invest.* *117*, 823-834.

Raha, T., Cheng, S.W., and Green, M.R. (2005). HIV-1 Tat stimulates transcription complex assembly through recruitment of TBP in the absence of TAFs. *PLoS Biol.* *3*, e44.

Screaton, R.A., Conkright, M.D., Katoh, Y., Best, J.L., Canettieri, G., Jeffries, S., Guzman, E., Niessen, S., Yates, J.R., 3rd, Takemori, H., *et al.* (2004). The CREB coactivator TORC2 functions as a calcium- and cAMP-sensitive coincidence detector. *Cell* *119*, 61-74.

Sun, L., Hui, A.M., Su, Q., Vortmeyer, A., Kotliarov, Y., Pastorino, S., Passaniti, A., Menon, J., Walling, J., Bailey, R., *et al.* (2006). Neuronal and glioma-derived stem cell factor induces angiogenesis within the brain. *Cancer Cell* *9*, 287-300.

Wang, Q., Wen, Y.G., Li, D.P., Xia, J., Zhou, C.Z., Yan, D.W., Tang, H.M., and Peng, Z.H. (2012). Upregulated INHBA expression is associated with poor survival in gastric cancer. *Med. Oncol.* 29, 77-83.
